# Supplementary material
Source: PubMed Central journal article supplement (PMC3838552)
Supplement: supp_mct227_mct227supp.pdf [file supp_mct227_mct227supp.pdf]

## SUPPLEMENTARY DATA

TABLE S1. Population-pairwise  $\Phi_{ST}$  values. Values in italics are not significantly different from zero.

|     | WH    | PF           | WHK          | LN    | SHM   | TB    | SCB          | PG           | CAR |
|-----|-------|--------------|--------------|-------|-------|-------|--------------|--------------|-----|
| WH  | -     |              |              |       |       |       |              |              |     |
| PF  | 0.390 | -            |              |       |       |       |              |              |     |
| WHK | 0.347 | <i>0.000</i> | -            |       |       |       |              |              |     |
| LN  | 0.292 | 0.487        | 0.423        | -     |       |       |              |              |     |
| SHM | 0.366 | 0.560        | 0.507        | 0.042 | -     |       |              |              |     |
| TB  | 0.254 | 0.340        | 0.277        | 0.067 | 0.141 | -     |              |              |     |
| SCB | 0.262 | 0.183        | 0.124        | 0.151 | 0.230 | 0.078 | -            |              |     |
| PG  | 0.252 | 0.078        | <i>0.035</i> | 0.248 | 0.331 | 0.125 | <i>0.032</i> | -            |     |
| CAR | 0.241 | 0.045        | <i>0.020</i> | 0.281 | 0.375 | 0.181 | <i>0.041</i> | <i>0.002</i> | -   |

  

|     | DRD          | CFG          | KYB   | BYB   | ASH          | TLY          | ARD   | LMB          | MAG   | BDB |
|-----|--------------|--------------|-------|-------|--------------|--------------|-------|--------------|-------|-----|
| DRD | -            |              |       |       |              |              |       |              |       |     |
| CFG | <i>0.000</i> | -            |       |       |              |              |       |              |       |     |
| KYB | <i>0.002</i> | <i>0.016</i> | -     |       |              |              |       |              |       |     |
| BYB | 0.420        | 0.405        | 0.414 | -     |              |              |       |              |       |     |
| ASH | 0.484        | 0.481        | 0.481 | 0.126 | -            |              |       |              |       |     |
| TLY | 0.436        | 0.428        | 0.428 | 0.101 | <i>0.011</i> | -            |       |              |       |     |
| ARD | 0.536        | 0.531        | 0.532 | 0.280 | 0.149        | 0.131        | -     |              |       |     |
| LMB | 0.506        | 0.497        | 0.497 | 0.124 | 0.030        | <i>0.010</i> | 0.207 | -            |       |     |
| MAG | 0.401        | 0.395        | 0.393 | 0.080 | 0.021        | <i>0.000</i> | 0.187 | <i>0.013</i> | -     |     |
| BDB | 0.388        | 0.379        | 0.382 | 0.056 | 0.079        | 0.040        | 0.198 | 0.069        | 0.044 | -   |
